1 **Dynamic cell wall modifications in brassicas**  
2 **during clubroot disease**

3

4 Julia Badstöber, Stefan Ciaghi, Sigrid Neuhauser

5 *University of Innsbruck, Institute of Microbiology, Technikerstraße 25, 6020 Innsbruck, Austria*

6

7 Author for correspondence:

8 *Sigrid Neuhauser*

9 *Tel: +43 (0) 512 507-51259*

10 *Email: [Sigrid.Neuhauser@uibk.ac.at](mailto:Sigrid.Neuhauser@uibk.ac.at)*

11

12

13

14

15 **Abstract**

16 Biotic interactions of plants and microbial pathogens can cause drastic changes in cell wall  
17 composition in response to developmental reprogramming caused as consequence of an  
18 infection. Clubroot disease, caused by the biotrophic plant pathogen *Plasmodiophora brassicae*  
19 (Phytophyta, Rhizaria), is the economically most important disease of Brassica crops  
20 worldwide. The disease is best known by the characteristic hypertrophied roots (root galls,  
21 clubroots). Amongst a series of physiological changes of the host tissue, the formation of the  
22 characteristic root galls leads to cell wall modification and reorganization. Cell wall chemistry  
23 and the hosts genetic repertoire are discussed to play a role in the resilience of plants against  
24 clubroot disease. Plant cells infected with *P. brassicae* are markedly enlarged, and look very  
25 differently from uninfected, healthy cells. Here we systematically review cell wall related  
26 processes that lead to the typical clubroot phenotype and provide novel insights how *P.*  
27 *brassicae* uses these modifications to benefit its own development. An infection with *P.*  
28 *brassicae* impacts on nearly all cell wall related processes, but all alterations are meaningful for  
29 successful growth and development of *P. brassicae*. Processes related to cell wall stability and  
30 rigidity (e.g. cellulose, pectin or lignin synthesis) are down-regulated, while cell wall degrading  
31 enzymes or processes that increase the flexibility of the host cell wall (e.g. expansin) are up-  
32 regulated. The here presented findings indicate that *P. brassicae* weakens the structural stability  
33 of its host cell while it increases its elasticity, which in consequence allows *P. brassicae* to  
34 grow bigger and ultimately to develop more resting spores. Consequently, the understanding of  
35 the modification of the host cell wall is important for the formation of the characteristic root  
36 galls but also to better understand clubroot disease.

37  
38 **Keywords:** *Plasmodiophora brassicae*, *Brassica oleracea*, clubroot, biotic interaction, cell  
39 wall, cell wall modification, microbial plant pathogens

## 40 Introduction

41 Upon infection with the obligate biotrophic plant parasite *Plasmodiophora brassicae*  
42 (Phytophyta, Rhizaria) marked morphological changes of the host cells occur. After infection  
43 the plant cells start to increase in size and start to alter their shape, which within a few weeks  
44 usually leads to gall formation in the roots (Kämper et al., 2006). These galls are the typical  
45 symptoms of clubroot disease (Figure 1). This morphological change goes inevitably hand in  
46 hand with marked changes in the transcriptomic profile of the host (Zhao et al., 2017; Irani et  
47 al., 2018; Olszak et al., 2019). Gall formation in the host is a common feature of phytophytid  
48 parasites: 19 of the 42 phytophytid species induce hypertrophies in their hosts (Neuhauser et  
49 al., 2011; Murúa et al., 2017). The induction of hypertrophies is not limited to plant hosts but  
50 can also be found in brown algae and oomycetes (Neuhauser et al., 2014). This formation of  
51 galls on the host is linked to the intracellular development of the phytophytids: gradually larger  
52 areas of the host are infected, and multinucleate plasmodia develop and fill their host cells  
53 during growth. Phytophytid growth and development goes hand in hand with developmental  
54 reprogramming of the host. Aim of this reprogramming is to generate a sink for nutrients and  
55 to create more space for the phytophytid to grow and ultimately to produce as many resting  
56 spores as possible. Here we will discuss the developmental reprogramming of the host  
57 associated with the brassica cell wall in clubroot infected plants.

58 The plant cell wall mainly consists of polysaccharides and structural proteins (Figure 2A). The  
59 polysaccharides cellulose, hemicelluloses and pectin, are (in varying proportions) the major  
60 building blocks of plant cell walls. The currently accepted concept of cell wall structure  
61 describes the cell wall as (i) a reinforcing net like structure (“fishing net”) of cellulose  
62 microfibrils, which are held together by (ii) xyloglucans that bind to the net in clusters  
63 stabilizing it and (iii) a pectin gel consisting of stabilized, rigid parts (Ca<sup>2+</sup>) and very loose  
64 pectin gel structures (Cosgrove, 2016).

65 Every plant cell has a primary cell wall, while secondary cell walls are formed in specialized  
66 areas of the plant. Primary cell walls are dynamic, growing structures. They are very dynamic  
67 in young cells and during cell division. The main function of primary cell walls is the protection,  
68 flexibility, basic structural support of the cytoplasm, but they also play a key role in the  
69 interaction between cells (Houston et al., 2016). Primary cell walls consist of carbohydrate-  
70 based polymers like cellulose, hemicellulose, pectins and glycoproteins (Cosgrove,  
71 2005; Sarkar et al., 2009). Primary cell walls are relatively thin, flexible and strong in order to  
72 withstand growth related, high turgor pressure, to hold wall stress relaxation and to enable cell  
73 elongation (Hamant and Traas, 2010). Newly synthesized wall polymers become integrated by  
74 crosslinking, physical interactions or via enzymes. Once plant cells mature and once they have  
75 finished expansion and growth, the secondary cell wall biosynthesis is initiated resulting in a  
76 remodeled biosynthetic machinery (Nakano et al., 2015). In contrast to the primary cell wall,  
77 the secondary cell wall compounds are cellulose, hemicelluloses (mostly xylans) and lignin  
78 (Cosgrove, 2005; Sarkar et al., 2009). The secondary cell wall is thicker and is formed at a later  
79 stage of plant development. Secondary cell walls mainly provide rigidity and allow for upright  
80 growth (Houston et al., 2016). Compared to the primary cell wall, they provide tensile strength  
81 rather than extensibility (Speck and Burgert, 2011).

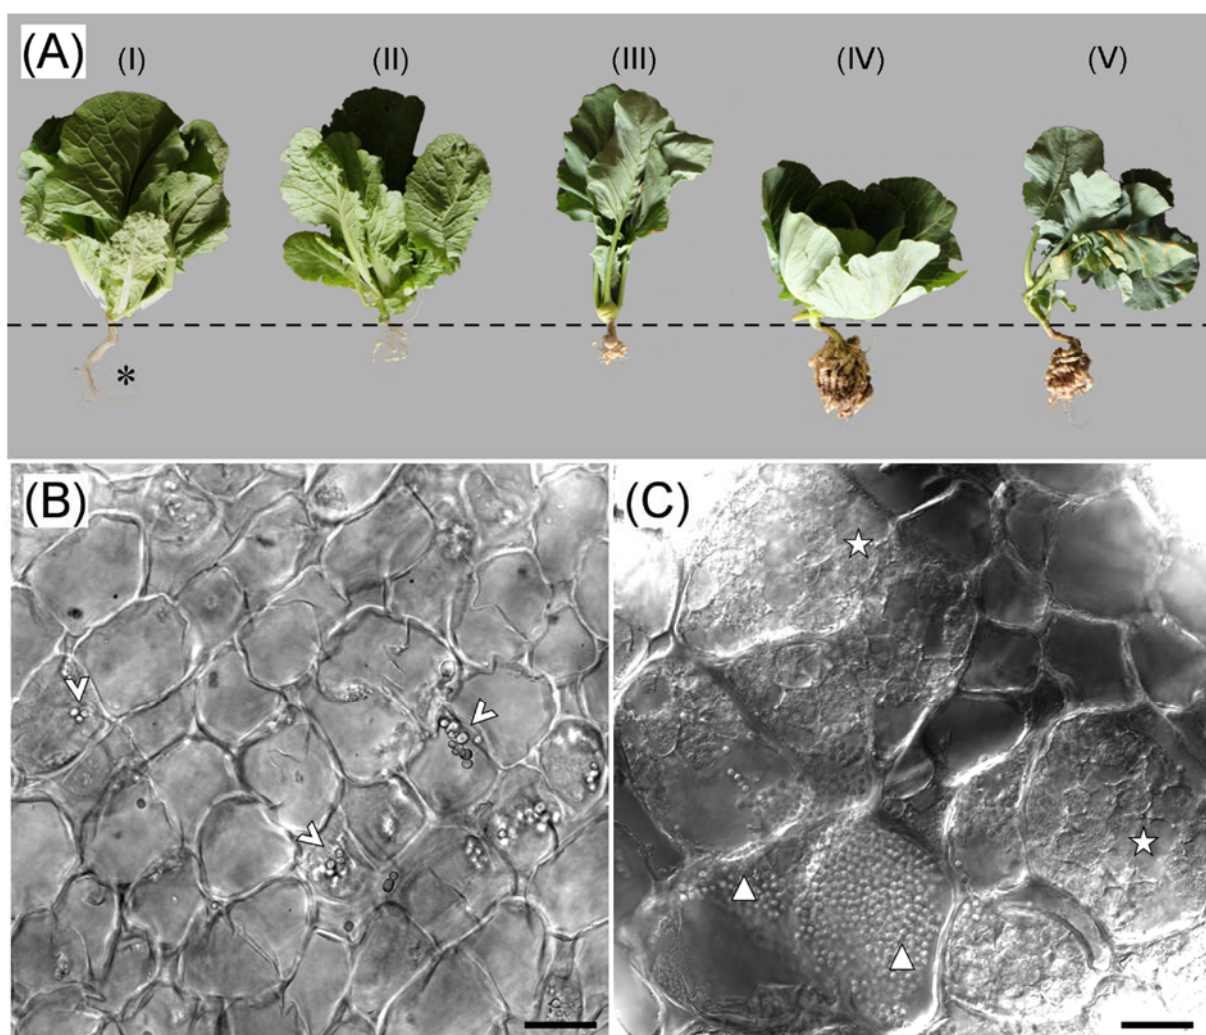

82

83 **Figure 1: Clubroot disease in *Brassica* species.** A: Typical clubroot symptoms caused by *Plasmodiophora*  
84 *brassicae*. Above ground development of infected plants is impaired while the roots show the typical  
85 hypertrophies. *Brassicae* spp. with and without (\*) clubroot symptoms. (I), (II) *Brassica rapa* subsp. *pekinensis*  
86 (Chinese cabbage); (III) *Brassica oleracea* var. *gongylodes* (kohlrabi); (IV) *Brassica oleracea* var. *capitata*  
87 (cabbage); (V) *Brassica oleracea* var. *italica* (broccoli). The dashed line indicates the soil surface. B: Section  
88 through a healthy *B. rapa* root. Starch granules are indicated with arrowheads. C: Section through a root gall of  
89 infected *B. rapa*. *Plasmodiophora brassicae* plasmodia are marked with stars and resting spores with triangles.  
90 Scale bar: 30  $\mu$ m.

91

92 The water insoluble carbohydrate cellulose is the main building block of both, primary and  
93 secondary, plant cell walls. Cellulose forms the load-bearing structure of the cell wall, where  
94 its fibrous structure is responsible for structural integrity (Maleki et al., 2016). Cellulose is  
95 composed of  $\beta$ -1,4-linked glucan chains, which are organized by the cellulose synthase  
96 complex (CSC), located in the plasma membrane, and which crystallize to microfibrils (Desprez  
97 et al., 2007). The family of cellulose synthase genes (CesA, belonging to the glycosyltransferase  
98 family 2, GT2) are the best studied genes contributing to cell wall synthesis, probably because  
99 they are present in a multitude of eukaryotes and prokaryotes (Popper et al., 2011).

100 Cellulose is synthesised by the cellulose synthase complex which is located in the plasma  
101 membrane and made of several cellulose synthase (CesA) subunits (Jones et al., 2016) and a

102 sucrose synthase (SuSy), which breaks down sucrose and generates UDP-Glucose (Figure 2A).  
103 Different isoforms of cellulose synthase proteins are responsible for the synthesis of cellulose  
104 during primary and secondary cell wall synthesis. Cesa1, Cesa3, and the Cesa6-related  
105 proteins Cesa2, Cesa5, Cesa9 are involved in primary cell wall cellulose synthesis, while  
106 Cesa4, Cesa7, and Cesa8 proteins are responsible for secondary cell wall cellulose synthesis  
107 (Desprez et al., 2007;Li et al., 2016). CesAs which are involved in secondary cell wall  
108 biosynthesis, also confer resistance against bacterial and fungal pathogens. It is important to  
109 note that this resistance pattern is independent of salicylic acid, ethylene and jasmonic acid  
110 signaling (Hernandez-Blanco et al., 2007). It is suggested, that Cesa1, Cesa3 and Cesa6 are  
111 present in the same plasma membrane protein complex responsible for cellulose biosynthesis,  
112 whereas Cesa2, and Cesa5 (related to Cesa6) have partially redundant roles (Desprez et al.,  
113 2007). Mutation of any of these primary and secondary cell wall cellulose synthesis genes  
114 (Cesa1, -3, -6 and Cesa4, -7, -8) lead to modifications in composition and structure of both  
115 types of cell wall (Hernandez-Blanco et al., 2007;Kumar et al., 2018).

116 The cellulose synthase superfamily also contains nine cellulose synthase-like (Csl) families  
117 (CslA - CslJ). The Csl genes share similarities in sequence with the Cesa genes and might be  
118 involved in the synthesis of the backbone of various polysaccharide polymers (Richmond and  
119 Somerville, 2000) like found e.g. in hemicelluloses of the plant cell wall (Lerouxel et al., 2006).  
120 Hemicelluloses include polymers like xyloglucans, mannans, glucomannans, and xylans and  
121 have  $\beta$ -1,4-linked backbones with an equatorial configuration (Scheller et al., 2010). Unlike  
122 cellulose, which is synthesized in the cell membrane, hemicelluloses and pectins are  
123 synthesized by glycosyltransferase (GTs) in the golgi apparatus (Suzuki et al., 2006) from  
124 where the native hemicellulose/pectins are transported to the membrane with vesicles. They are  
125 then secreted to the apoplast and enzymatically incorporated into the cell wall (Verbancic et al.,  
126 2018) (Figure 2B).

127 Pectins are the most heterogeneous and complex group of polysaccharides of the cell wall and  
128 mainly occur in the primary cell wall. Pectins found in the plant cell wall are homogalacturonan  
129 (HG), rhamnogalacturonan I (RGI) and II (RGII), and xylogalacturonan (XGA). Together with  
130 hemicelluloses they form the matrix in which cellulose microfibrils are embedded. Pectins play  
131 important roles for cell expansion, adhesion, strength, and porosity, but are also relevant for  
132 signaling between cells (Harholt et al., 2010;Ferrari et al., 2013). Together with other cell wall  
133 forming polymers, pectin is involved in providing physical strength to the plant. Plant  
134 pathogens can cause degradation of pectin by breaking it down into oligogalacturonides (OGs),  
135 which are involved in signaling for sensing pathogen caused wall degradation (Ferrari et al.,  
136 2013) (Figure 2B).

137 The deposition of lignin in the polysaccharide matrix during maturation of the secondary cell  
138 wall is typically the final step of secondary cell wall biosynthesis (Meents et al., 2018). It  
139 ensures two characteristic properties of the secondary cell wall: increased rigidity and  
140 impermeability. Lignin biosynthesis can be induced during cell development and maturation.  
141 But lignification of the plant cell wall can also be a response to biotic and abiotic stress, for  
142 example to protect other cell wall polysaccharides from degradation (Tronchet et al., 2010).



143 Plant cell walls are very dynamic, and responsive systems and can be modulated and remodeled  
144 by the plant itself (e.g. cell growth, elongation, reinforcement) or by pathogens (e.g. degrading  
145 enzymes (Underwood, 2012)). When *P. brassicae* infects the root cells of its host, those cells  
146 show a marked cell expansion, what differs significantly from cell growth in symptomless roots.  
147 Generally growth or an increasing size of plant cells is accompanied by the enlargement of the  
148 cell caused by an increase of turgor inside the plant which is generating cell wall stress  
149 (Cosgrove, 2016). This cell wall stress is relaxed by cell wall loosening processes (including  
150 xylanases, expansins etc) after a certain tipping point. These structural changes in the cell wall  
151 allow rapid expansion, which then again results in reduced turgor and the possibility for water  
152 to permeate the cell. This is followed by growth of the cell and by an increase of cell wall  
153 material. Cell wall stress is subsequently followed by reinforcement of the now “loose” cell  
154 wall through structural cell wall components. Enzymes like cellulases, Xyloglucan  
155 endotransglycosylases/hydrolases (XTHs) and expansins are mainly involved in wall  
156 expansion. They are supposed to disrupt noncovalent linkages between wall polysaccharides  
157 (Cosgrove, 2005) (Figure 2B).

158 Plant cell wall degrading enzymes (CWDEs) play an inevitable role for both, plants and  
159 pathogens. In plants they are involved in cell wall dynamics, e.g. in loosening, breakdown and  
160 the deposition of newly synthesized wall components (Marin-Rodriguez et al., 2002). They are  
161 also important for infection and establishment of plant pathogens (Kämper et al.). De-  
162 polymerization causes modification and alteration in wall rheology (Figure 2B). However,  
163 biotrophic pathogens like *P. brassicae* generally encode few CWDEs to avoid their recognition  
164 by the plant host (Kämper et al., 2006; Schwelm et al., 2015).

165

## 166 **Materials and Methods**

167 Cell wall related genes were extracted from an existing *Brassica oleracea* var. *gongylodes*  
168 RNA-seq dataset (Ciaghi et al., 2019) were used (Accession: European Nucleotide Archive  
169 (ENA; <https://www.ebi.ac.uk/ena>) under the project PRJEB26435). These RNAseq data  
170 originated from white spindle galls and brownish spindle galls. Relevant pathways related to  
171 cell wall biosynthesis, rigidity, modulation, elongation, growth etc. were analyzed using all  
172 available information. Plant genes of interest (i.e. genes related with cellulose, hemicellulose,  
173 pectin, and lignin metabolism and cell expansion) were identified in this data using automatic  
174 gene annotations provided by MapMan (Thimm et al., 2004), KAAS (KEGG Automatic  
175 Annotation Server; Moriya et al., 2007), and eggNOG mapper (Huerta-Cepas et al., 2016).  
176 Transcripts fulfilling the criteria were curated manually. In general, only significantly  
177 differentially expressed genes (DEGs, adjusted p-value < 0.05) were analyzed but very rarely  
178 non-significant DEGs were included where it was useful for the biological interpretation and  
179 discussion of the data (noted in the text). This approach was chosen, because in a complex  
180 dataset like clubroots that contain a multitude of physiologically and developmental different  
181 cells smaller changes might still be relevant for a biological discussion of the plant pathogen  
182 interaction and for the formulation of a biological hypothesis. Log<sub>2</sub>-fold change values of  
183 significant DEGs (infected vs. control) and their corresponding FPKM (fragments per kilobase  
184 per million reads) values were used for this study, without any further threshold values.

185 MapMan, KAAS, eggNOG and TAIR Blast annotations were compared and genes grouped by  
186 those automated annotations. Putative isoforms were validated using alignments of the amino  
187 acid and protein sequence when contradictory expression values of DEGs were found. Isoforms  
188 were weighted based on their length, on sequence similarity and based on the general expression  
189 trend of all isoforms. Additionally, results published studies on clubroot disease were integrated  
190 to provide a comprehensive overview on cell wall related changes in clubroot infected plants.

191

## 192 **Results**

### 193 **Synthesis of cell wall components**

#### 194 **Cellulose synthase (CesA) and cellulose synthase-like (Csl) gene expression**

195 Transcripts of the cellulose synthases CesA1-6 were identified in our data (Tab. S1). All of  
196 them were significantly down-regulated in clubroots compared with the control. CesA1-A6  
197 transcripts were down-regulated during clubroot development.

198 Cellulose synthase-like A2 (CslA2) transcripts (Tab. S2) were significantly up-regulated in  
199 clubroots compared with the control, while CslA (Csl A3, 7, 11) transcripts were down-  
200 regulated, although this down-regulation was not statistically significant. CslA genes are  
201 involved in the beta-mannan biosynthesis, while CslC genes are supposed to be involved in  
202 xyloglucan synthesis. Of the CslC gene family transcripts belonging to CslC4, 5, 6, 8, 12 were  
203 identified in our dataset. Compared with the control, CslC4 and CslC6 was down-regulated in  
204 clubroots while CslC5 genes were up-regulated (Tab. S2). CslD genes are involved in the xylan  
205 and mannan biosynthesis and CslD3 were significantly down-regulated while CslD2, 5 were  
206 up-regulated. From the CslE family only CslE1 transcripts were significantly up-regulated  
207 clubroots.

208 To summarize: cellulose synthases (CesA family) were down-regulated in clubroots, whereas  
209 cellulose synthase-like genes (Csl) presented a more ambiguous picture, where some genes  
210 were up-regulated (CslA2, CslC5, CslD2, CslD5, CslE1) while others were down-regulated  
211 (CslA3, CslA7, CslA11, CslC4, CslC6, CslD3) in clubroot infected plants.

#### 212 **Pectin, lignin and callose synthesis genes**

213 In clubroot infected tissue, transcripts linked to the synthesis of the most abundant pectins were  
214 down-regulated. Rhm1, Rhm2, and Quasimodo1 (Qua1) are coding for enzymes involved in  
215 the synthesis of rhamnose I (monosaccharides), and are involved in the homogalacturonan  
216 (polysaccharide) synthesis, two of the major components of pectin. All three genes were  
217 significantly down-regulated in clubroot tissue (Tab. S3).

218 Genes coding for an isoform of UDP-glucuronic acid decarboxylase (UXS), which produces  
219 UDP-xylose as a substrate for cell wall carbohydrates like pectin and hemicelluloses, were up-  
220 regulated (UXS1, UXS3, UXS5) and UXS2 was down-regulated in clubroot infected plants  
221 (Tab. S3).

222 In clubroot tissue, the genes involved in lignin biosynthesis were generally down-regulated in  
223 roots infected with *P. brassicae* (Tab. S4). The first three steps of the phenylpropanoid pathway,

224 which initiates lignin biosynthesis are mediated through PAL (phenylalanine ammonia lyase),  
225 C4H (cinnamate 4-hydroxylase), and 4CL (4-coumarate:CoA ligase). Transcripts belonging to  
226 these gene families were down-regulated in clubroot infected tissue. Other lignin biosynthesis  
227 genes like COMT (caffeic acid O-methyltransferase), CCR (cinnamoyl-CoA reductase), and  
228 F5H (ferulate 5-hydroxylase) were also down-regulated.

229 Laccases and peroxidases are involved in the monolignol dehydrogenation step during lignin  
230 biosynthesis. With few exceptions genes coding for laccases and peroxidases involved in lignin  
231 synthesis were down-regulated in clubroot infected plants (LAC1, LAC3, LAC7, LAC11,  
232 LAC17). LAC6 and LAC13 were up-regulated.

233 Glucan-synthase-like genes (GSL), involved in callose biosynthesis, were generally down-  
234 regulated in clubroot tissue (GSL3, GSL7, GSL8, GSL10, GSL12) (Tab. S5). All these genes  
235 encode callose synthase (CalS). Genes coding for CalS1, the catalytic subunit 1 of callose  
236 synthase were up-regulated. UGT1 (UDP-glucose transferase 1), which is also involved in  
237 callose synthesis (transport of UDP-glucose to CalS), was down-regulated.

238

## 239 **2. Degradation and modification of components**

### 240 **Cell wall degrading and modifying enzymes and inhibition of cell wall degradation.**

241 The most abundant transcripts of cell wall degrading enzymes found in clubroot infected plant  
242 tissue were pectinases and cellulases. Transcripts belonging to pectin degrading enzymes of the  
243 polygalacturonases (PGs), pectate lyases (PLs), pectin methylesterases (PMEs), and PAEs  
244 (pectinacetylsterases) were mostly up-regulated (some of them strongly) in infected roots  
245 (Tab. S7). Transcripts belonging to glycoside hydrolase family 28 proteins (GH28) were up-  
246 regulated in clubroots. All genes coding for PMEs (like PME3, PME 5, PME31), and most  
247 genes coding for PAEs (like PAE7, PAE 9-11) were up-regulated in infected plants, only PAE5  
248 and PAE12 were down-regulated. Genes coding for callose degradation, or deposition were  
249 also up-regulated in clubroots (Tab. S5, S8).

250 Cellulases with hydrolase activity were generally up-regulated in clubroots, including glycosyl  
251 hydrolases family 9 (endoglucanases) like GH9B1, 6-8, 12, 13, GH9A1, and GH9C3. GH9B1,  
252 -13, GH9A1 and GH9C3 were down-regulated in root galls. Some genes of the glycosyl  
253 hydrolases family 17 were up-regulated in clubroots. Beta glucosidases were up- or down-  
254 regulated in clubroots (Tab. S8).

255 Inhibitors of cell wall degrading enzymes like polygalacturonases (PGs) and pectin  
256 methylesterases (PMEs), which dynamically modulate PMEs and PGs to inhibit pectin  
257 depolymerisation were down-regulated in clubroots (Tab. S9). Genes coding for PGIP2  
258 (polygalacturonase inhibitor protein 2) were strongly down-regulated. PGIP1 were mainly  
259 down-regulated in infected roots. Genes coding for PMEIs (pectin methylesterase inhibitors)  
260 were also mainly down-regulated in clubroots, for example like PMEI6, -11 and PMEI13. Root  
261 hair specific 12 (RHS12) with pectin methylesterase inhibitor activity was also down-regulated  
262 in clubroots.

263



### 264 **3. Cell wall loosening, elongation**

#### 265 ***P. brassicae* infection causes cell wall loosening in plant roots**

266 Genes involved in cell wall loosening and elongation processes like xyloglucan  
267 endotransglucosylases/hydrolases (XTHs) or expansins (EXP) and expansin-like genes (EXL)  
268 were mainly up-regulated (Tab. S10, S11). (XTH4, -9, -16, -24 and -32, EXP1, -6, -13, -15 and  
269 -20, EXPB2, and -3, EXLB1). In contrast genes like XTH 8, -10, and XTH21 and EXLA1, -2,  
270 and EXP 3 and EXP17 were down-regulated, in clubroots.

271 Wall associated kinases (WAKs) and wall associated kinase-like genes (WAKLs) are also  
272 involved in cell elongation, and all WAKs were up-regulated, whereas WAKLs were down-  
273 regulated in clubroots (Tab. S12).

274 Genes coding for SHAVEN3 (SHV3) and SHV3-like (SVL1) are also involved in cell  
275 expansion and alteration of wall rigidity. They were both up-regulated clubroots (Tab. S13).

276

### 277 **Discussion**

#### 278 ***Plasmodiophora brassicae* induces alterations of host cell wall rigidity**

279 An infection with the phytomyxid *Plasmodiophora brassicae* results in molecular and  
280 physiological changes in the plant host: abnormal root growth results in gall formation. This is  
281 accompanied by altered metabolism, physiology and modifications of the host cell walls  
282 (Dekhuijzen and Overeem, 1971; Kavanagh and Williams, 1981; Ludwig-Müller et al., 1993;  
283 Devos et al., 2005; Ludwig-Müller et al., 2009; Malinowski et al., 2012). The growth of the  
284 host cells is resulting in surface increase, however, this is not automatically coupled to addition  
285 of new cell wall components (Cosgrove, 2014a). In clubroot infected cells the biosynthesis of  
286 wall components like cellulose, hemicelluloses, pectin (primary cell wall) and also lignin  
287 (secondary cell wall), which together form the load-bearing structures in the cell wall, is down-  
288 regulated (Tab. S1 – S4). These findings could be also shown in other experiments containing  
289 transcription analysis in clubroot infected *A. thaliana* (Irani et al., 2018). Genes involved in  
290 lignin biosynthesis are also down-regulated in former studies with infected *B. napus* (Cao et al.,  
291 2008; Ludwig-Müller et al., 2009). These results suggest an inhibition of cell wall component  
292 biosynthesis in clubroot infected tissue. The observed down-regulation of genes coding for  
293 biosynthesis of cellulose synthases (CesA), pectins (RHM, QUA) and hemicellulose (Csl  
294 genes) in infected plants supports this finding, which indicates that the cell walls of clubroot  
295 infected cells are less rigid than their counterparts in uninfected plants. Also transcripts of genes  
296 coding for cell wall degrading enzymes (CWDEs) like pectinases [polyglacturonases (PGs),  
297 pectate lyases (PLs) and pectin methylesterases (PMEs)] and cellulases with hydrolase activity  
298 were up-regulated (some strongly) in infected plants (Tab. S7, S8). These findings could also  
299 be validated in other studies of early infection of *B. oleracea* infected with *P. brassicae* (Wang  
300 et al., 2019).

301 In other words, *P. brassicae* is responsible for a decrease in root cell wall rigidity and stability  
302 in clubroots via down-regulation of the biosynthesis of primary and secondary cell wall  
303 components like cellulose, pectin, callose or lignin. On the other hand, enzymes which degrade  
304 these structural elements are up-regulated in clubroots. This loss in stability does fit the  
305 biological development of *P. brassicae*, because the multinucleate plasmodia gradually fill the

306 significantly enlarged host cells. By reducing the rigidity of the cell wall, *P. brassicae* can grow  
307 to a larger size as the barrier posed by the cell wall gets more flexible. The processes seen at  
308 the transcriptomic level resemble the processes described during wall stress related growth as  
309 processes that control rigidity, but also extensibility is differentially regulated - with the main  
310 aim to withstand increasing turgor pressure without rupture of the cell (Cosgrove, 2016), while  
311 increased turgor-like pressure is built up by the growing parasite. That decreased rigidity of the  
312 cell wall has an important role for clubroot symptom development. This is supported by the  
313 finding that clubroot tolerant plants show transcriptomic signatures of an increased cell wall  
314 stability (Lahlali et al., 2017). The limited arsenal of CWDEs of *P. brassicae* has been notable  
315 when the genome of this parasite was analyzed (Schwelm et al., 2015; Rolfe et al., 2016). A lack  
316 of CWDEs is on the one hand a feature that is seen in many biotrophic plant parasites (Kämper  
317 et al., 2006). But on the other hand, the transcriptional changes observed in clubroot suggest  
318 that *P. brassicae* is able to compensate this by reprogramming the host metabolism.

319

320 In addition to a reduced rigidity of the plant cell wall strength, depolymerized pectin can serve  
321 as carbon source for pathogen development (Jia et al., 2009) and increases the accessibility of  
322 other plant cell wall components like cellulose and hemicelluloses to CWDEs, which can enable  
323 further and faster cell wall breakdown (Xue et al., 2018). This again would tie in very well with  
324 the biology of *P. brassicae*, which is obtaining nutrients from its host. So an increased  
325 availability of cell wall degradation products (sugars) can provide energy for *P. brassicae*. In  
326 order to protect the plant cells from excessive degradation of wall components through  
327 pectinases like PMEases or PGs, the host is able to produce enzyme-inhibiting enzymes, called  
328 PMEIs (PME-inhibitor) and PGIPs (PG-inhibiting protein). These enzymes modulate PMEases  
329 and PGs dynamically, and genes coding for these inhibitors were all down-regulated in clubroot  
330 tissue (Tab. S9). So as expected from a biotroph, *P. brassicae* induces changes in its host via  
331 inhibiting a cell wall related plant defense mechanism.

332 Plant genes involved in the metabolism of sugars that are building blocks of cell wall  
333 components were up-regulated in infected roots (Tab. S6). Transcripts of genes coding for  
334 sucrose synthase (SuSy), which catalyzes the reaction from sucrose to UDP-glucose and  
335 fructose are one example. UDP-glucose is needed as substrate for cellulose synthesis using  
336 Cesa and for callose synthesis using CalS (Schneider et al., 2016) (Figure 2A). Genes coding  
337 for UDP-glucuronate decarboxylase (UXS), which produces UDP-xylose, a substrate for  
338 hemicelluloses and pectin, are up-regulated in clubroot transcriptomes (Tab. S3). Up-regulated  
339 sugar metabolism could also be shown in several other studies of clubroot infected *A. thaliana*  
340 (Siemens et al., 2006; Siemens et al., 2011; Walerowski et al., 2018). Summarizing these  
341 findings, it can be hypothesized that the increase in plant transcripts coding for CWDEs likely  
342 results in increased sugar availability via the degradation of cell wall components. On the other  
343 hand, the increase of transcripts belonging to sugar metabolic pathways likely results in an  
344 increased production of cell wall related sugars such as UDP-glucose or UDP-xylose. Overall  
345 it can be assumed, that these sugars might be taken up by *P. brassicae* as energy source,  
346 however, this hypothesis needs to be addressed separately.

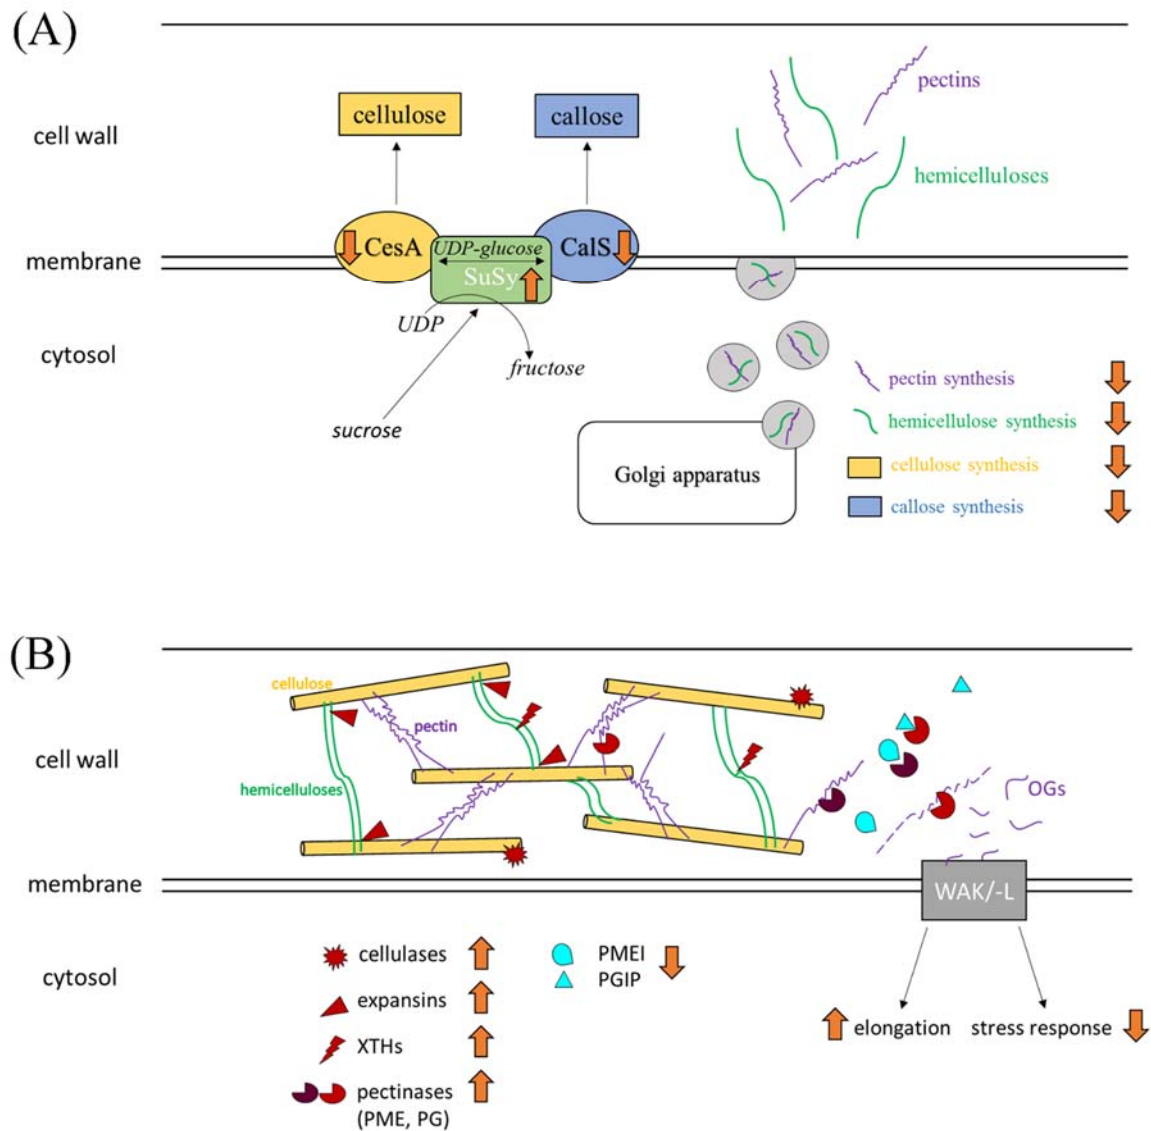

347  
 348 **Figure 2: Synthesis of plant cell wall components (A) and modulation of cell wall components and related**  
 349 **plant response (B).** (A): Cellulose and callose synthesis are mediated through cellulose synthase (CesA and  
 350 callose synthase (CalS) in the plasma membrane. UDP-glucose serves as substrate for the synthesis. Sucrose  
 351 synthase breaks down sucrose and generates UDP-glucose and fructose. Pectins and hemicelluloses are  
 352 synthesized in the Golgi apparatus. Native pectins and hemicelluloses with sufficient length are transported by  
 353 vesicles, secreted to the apoplast, and enzymatically incorporated into the cell wall. During infection with the  
 354 biotrophic clubroot pathogen *Plasmodiophora brassicae*, genes involved in the synthesis of cellulose,  
 355 hemicelluloses, pectins and callose are down-regulated. Genes coding for sucrose synthase are up-regulated in  
 356 clubroots. Up- and down-regulated processes in clubroots is indicated with orange arrows. (B): Cell wall degrading  
 357 and modulating enzymes and their target components. Cellulases modulate cellulose fibrils, XTHs cleave and re-  
 358 anchor xyloglucan chains (hemicellulose), expansins disrupt linkages between hemicellulose and cellulose, and  
 359 pectinases cleave pectins. Depolymerized pectins (oligoglacturonases, OGs) are bound and recognized by wall  
 360 associated kinase/-like (WAK/L) and can trigger further plant response cascades. Pectinase-inhibitors (PMEIs,  
 361 PGIPs) inhibit PME and PG activity. During infection with the biotrophic clubroot pathogen *Plasmodiophora*  
 362 *brassicae*, genes like cellulases, pectinases (cell wall component degradation) and expansins and XTHs (cell  
 363 expansion) are up-regulated in infected tissue. Enzyme inhibitors like PMEI or PGIP are down-regulated. Genes  
 364 coding for WAKs (involved in cell elongation) are up-regulated and for WAKLs (stress response) are down-  
 365 regulated in clubroots. Up- and down-regulated processes in clubroots is indicated with orange arrows.

366

## 367 ***Plasmodiophora brassicae* causes cell elongation and inhibits host defense** 368 **response**

369 To allow for cell expansion, an organized disruption of the existing cell wall homeostasis is  
370 followed by reinforcement via the formation of new linkages of wall components. Organized  
371 cell wall disruption can happen with the aid of CWDEs as described above, or via the enzymatic  
372 modification of wall rigidity and stability with expansins and xyloglucan  
373 endotransglycosylases/hydrolases (XTHs). Expansins and XTHs are directly involved and  
374 responsible for such modifications (Figure 2B). Transcripts of genes coding for expansins and  
375 for XTHs were significantly up-regulated in our data and previous transcriptome profiling  
376 works of clubroots (Siemens et al., 2006; Irani et al., 2018) (Tab. S10, S11). XTH activity was  
377 also detected in *B. rapa* by Devos et al. (2005). XTHs have two functions, either as xyloglucan  
378 endohydrolase (XEH), which cleaves xyloglucan chains, or as xyloglucan endotransglycosylase  
379 (XET), which is able to re-anchor two xyloglucan microfibrils, which have ruptured as result  
380 of turgor driven cell wall disruption (Rose et al., 2002). The majority of *B. oleracea* genes that  
381 were up-regulated in clubroots were annotated as XTHs possessing both functions (cleavage  
382 and re-anchoring). Notably, transcripts of genes that only feature the re-anchor activity (XET)  
383 were down-regulated. In other words, when *P. brassicae* plasmodia are growing in the infected  
384 host cell they might activate certain aspects of turgor driven cell growth in their host (up-  
385 regulation of expansins and XTHs with XEH and XET activity), but inhibit the plants ability to  
386 re-inforce the cell wall (down-regulation of XTHs with only XET activity). Other genes  
387 involved in cell expansion and alteration of wall rigidity with important roles in cell wall  
388 organization are genes coding for SHV3 (SHAVEN3) and SVL1 (SHV3-like). *Arabidopsis*  
389 *thaliana* SHV3 and SVL1 double mutants resulted in further defects like abnormal cell  
390 expansion, bloat guard cells as well as ectopic lignin deposits. Also pectin modifications and  
391 altered cellulose contents were observed (Hayashi et al., 2008). Related genes were up-  
392 regulated in clubroots (Tab. S7, S8, S13).

393 Wall associated kinases (WAKs) belong to the receptor-like kinases with a cytoplasmic protein  
394 kinase domain. They are located in the plasma membrane and serve as pectin receptors (cell  
395 wall side), for longer pectins of native cell walls and short pectic fragments of oligogalacturonic  
396 acid (OGs) (Kohorn, 2016) (Figure 2B). WAKs do not just bind pectins, they also recognize  
397 pectin fragments, which can be produced by pectin-degrading plant pathogens. This gene family  
398 is also involved in triggering stress response cascades in the host plant (Sivaguru et al., 2003;  
399 Kohorn and Kohorn, 2012). WAK genes are also discussed to be involved in cell elongation,  
400 because WAK mutants with lower levels of WAK proteins led to loss of cell expansion (Lally  
401 et al., 2001), shorter roots and a reduction in vacuolar invertase what might control expansion  
402 indirectly through turgor pressure (Kohorn et al., 2006; Kohorn et al., 2009; Kohorn and  
403 Kohorn, 2012). WAK-like genes (WAKL) share sequence similarities with WAKs, but have a  
404 direct role in disease resistance at least in maize (Hurni et al., 2015; Zuo et al., 2015). Evidence  
405 for this is provided, because dominant mutant alleles of WAKLs in *A. thaliana* showed resistance  
406 to *Fusarium* (Diener and Ausubel, 2005). In clubroot infected plants, all genes coding for  
407 WAKs were up-regulated which fits very well to the above discussed increase in cell expansion.  
408 Overall, stress response is down-regulated in clubroots (Zhao et al., 2017), so an influence in  
409 stress response is not clear. All genes encoding WAKLs are down-regulated in clubroots, what



410 might influence resistance negatively of host plants, because WAKLs are supposed to play a  
411 role in pathogen resistance (Verica and He, 2002) (Tab. S12).

412 Upon pathogen derived wall damage, the plant immune system can initiate a reinforcement of  
413 the cell wall as first line of defense, where a reinforced cell wall acts as physical barrier to  
414 infection. In order to slow down or to prevent pathogen invasion, callose or lignin containing  
415 cell wall thickenings are formed at infection sites (Stone, 1992). The most notable biochemical  
416 difference between clubroot-susceptible and resistant plants is an increased biosynthesis of  
417 lignin and phenolics, in the resistant plants (Lahlali et al., 2017). The key precursor of the  
418 phenylpropanoid and lignin pathways is L-phenylalanine (Barber and Mitchell, 1997; Shadle  
419 et al., 2003). PAL (L-phenylalanine ammonia-lyase) is the entry point enzyme to these  
420 pathways and the key regulator of the phenylpropanoid pathway, which can also be induced by  
421 pathogens (MauchMani and Slusarenko, 1996; Cozzolino, 2014). PAL and the lignin  
422 biosynthetic pathway appear to play an important role in resistance to clubroot conferring to  
423 the characterized clubroot resistance gene *Rcr1*. In clubroot resistant varieties of oilseed rape,  
424 PAL was highly up-regulated resulting in changes of the cell wall composition and lignification  
425 after contact with *P. brassicae* (Lahlali et al., 2017). PAL genes and the other important genes  
426 involved in lignin biosynthesis (coding for cinnamate 4-hydroxylase (C4H) and 4-  
427 coumarate:CoA ligase (4CL)) were down-regulated (Tab. S4), suggesting *P. brassicae*  
428 infection suppresses induced defense and resistance response of the *Brassica* host (Ciaghi et  
429 al., 2018).

430 Another possibility of cell wall reinforcement are callose-containing papillae (Voigt, 2014).  
431 Increased callose deposition is associated with the clubroot resistance gene *Rcr1* (Chu et al.,  
432 2014). Callose is synthesized in specialized cell walls like the cell plate (separates dividing  
433 cells) by the callose synthase, which is encoded by CalS genes belonging to the GSL (glucan  
434 synthase-like) gene family. This family is divided in genes involved in fertility and cell  
435 division (GSL1, GSL2, GSL6, GSL8, GSL10) and in wall reinforcement (GSL5, GSL7,  
436 GSL12) (Verma and Hong, 2001). In our data, many transcripts could be annotated as GSL1,  
437 GLS8, GSL10 (fertility and division), and GSL7, GSL12 (reinforcement). All of them were  
438 down-regulated in our dataset (Tab. S5). GSL5, also known as powdery mildew resistant 4  
439 (PMR4) involved in callose biosynthesis, is known to be re-located in the plasma membrane  
440 via vesicle-like bodies to papillae formation sites in *Arabidopsis thaliana* (Flors et al., 2008;  
441 Ellinger et al., 2013). GSL5 is (not significantly) down-regulated in our dataset, however, all  
442 available data suggest that an infection with *P. brassicae* leads to a decreased callose  
443 biosynthesis, deposition of callose synthase to pathogen site and for increased deposition of  
444 already synthesized callose, in order to reduce plant defense response. The genes PEN2 and  
445 PEN3 (Penetration2, 3) are also involved in callose deposition and glucosinolate activation and  
446 therefore necessary for plant resistance (Clay et al., 2009). Genes coding for PEN2 and PEN3  
447 are up-regulated in our data, suggesting increased callose deposition and glucosinolate  
448 activation (Tab. S5). Glucosinolates are sulfur-containing glucosides and known as essential  
449 antimicrobial components in *Arabidopsis thaliana* (Hogge et al., 1988). Microorganisms are  
450 inhibited by breakdown products of glucosinolates derived through thioglucosidases  
451 (Kirkegaard et al., 1996; Manici et al., 1997; Tierens et al., 2001). In our data, genes coding for  
452 thioglucosidases, like TGG1 and TGG2 are extremely down-regulated, and thus hydrolysis into



453 toxic, antimicrobial components (Tab. S14). This fact also suggests the pathogen *P. brassicae*  
454 inhibits plant defense response through suppression of the production of toxic antimicrobial  
455 substances.

456

## 457 **Conclusion**

458 An infection of brassicas with the biotrophic plant pathogen *Plasmodiophora brassicae*, often  
459 leads to characteristic hypertrophied roots, the so called clubroots. Amongst other physiological  
460 changes clubroot infection leads to an altered biosynthesis of cell wall components. Genes  
461 coding for proteins involved in cellulose, hemicellulose, pectin, callose and lignin biosynthesis  
462 like CesAs (cellulose synthase), Csls (cellulose synthase -like), and CalS/GSLs (callose  
463 synthase) were down-regulated in infected plants. Also genes involved in pectin synthesis like  
464 Rhm and Qual, or in the initial steps of lignin biosynthesis (PAL, C4H, 4CL) were down-  
465 regulated. Clubroot infection also leads to degradation and modification of existing wall  
466 components what results in decreased wall rigidity. Transcripts belonging to  
467 degrading/modifying enzymes, e.g. of pectins (PGs, PLs, PME<sub>s</sub>, PAE<sub>s</sub>), cellulose through  
468 cellulases with hydrolase activity, or callose through degradation and deposition were up-  
469 regulated in clubroots. Gene expression for enzymes with degradation inhibiting activity were  
470 down-regulated in infected tissue. Clubroot infection also leads to massive host cell expansion,  
471 what we also see in transcriptomic data. Genes coding for XTHs and expansins, which allow  
472 cell wall loosening were up-regulated. Also for WAK/L genes, which are involved in cell  
473 elongation and defense response, gene expression differed. Elongation processes were up-  
474 regulated and defense response was down-regulated in clubroots. Genes involved in plant  
475 defense mechanisms leading to reinforcement of cell walls (e.g. callose synthesis, lignification)  
476 were down-regulated in clubroots, whereas deposition of callose was up-regulated. All these  
477 processes concur with observations during clubroot development, and the typical clubroot  
478 phenotype is a result of efficient strategies of *P. brassicae* to influence host biology. How and  
479 via which mechanisms this takes place remains to be answered with more targeted studies in  
480 the future.

481

## 482 **Acknowledgements**

483 JB, SC and SN were funded by the Austrian Science Fund (FWF): grant Y801-B16 (START-  
484 grant).

485

486

## 487 **Author Contribution and References**

488 JB and SN designed the research, SC performed bioinformatic and statistic analysis, JB and SC  
489 interpreted data; JB, SC and SN wrote the manuscript; All authors read and approved the final  
490 manuscript.

- 491 Barber, M.S., and Mitchell, H.J. (1997). Regulation of phenylpropanoid metabolism in relation to  
492 lignin biosynthesis in plants. *International Review of Cytology - a Survey of Cell Biology, Vol*  
493 *172* 172, 243-293.
- 494 Cao, T., Srivastava, S., Rahman, M.H., Kav, N.N.V., Hotte, N., Deyholos, M.K., and Strelkov, S.E.  
495 (2008). Proteome-level changes in the roots of *Brassica napus* as a result of *Plasmodiophora*  
496 *brassicae* infection. *Plant Science* 174, 97-115.
- 497 Chu, M., Song, T., Falk, K.C., Zhang, X., Liu, X., Chang, A., Lahlali, R., Mcgregor, L., Gossen, B.D.,  
498 Peng, G., and Yu, F. (2014). Fine mapping of Rcr1 and analyses of its effect on transcriptome  
499 patterns during infection by *Plasmodiophora brassicae*. *BMC Genomics* 15, 1166.
- 500 Ciaghi, S., Schwelm, A., and Neuhauser, S. (2018). Transcriptomic response in symptomless roots of  
501 clubroot infected kohlrabi mirrors resistant plants. *bioRxiv*, 391516.
- 502 Ciaghi, S., Schwelm, A., and Neuhauser, S. (2019). Transcriptomic response in symptomless roots of  
503 clubroot infected kohlrabi (*Brassica oleracea* var. *gongylodes*) mirrors resistant plants.  
504 *bioRxiv*, 391516.
- 505 Clay, N.K., Adio, A.M., Denoux, C., Jander, G., and Ausubel, F.M. (2009). Glucosinolate metabolites  
506 required for an *Arabidopsis* innate immune response. *Science* 323, 95-101.
- 507 Cosgrove, D.J. (2005). Growth of the plant cell wall. *Nat Rev Mol Cell Biol* 6, 850-861.
- 508 Cosgrove, D.J. (2014a). "Plant Cell Growth and Elongation," in *eLS*).
- 509 Cosgrove, D.J. (2016). Plant cell wall extensibility: connecting plant cell growth with cell wall  
510 structure, mechanics, and the action of wall-modifying enzymes. *J Exp Bot* 67, 463-476.
- 511 Cozzolino, D. (2014). Use of Infrared Spectroscopy for In-Field Measurement and Phenotyping of  
512 Plant Properties: Instrumentation, Data Analysis, and Examples. *Applied Spectroscopy*  
513 *Reviews* 49, 564-584.
- 514 Dekhuijzen, H.M., and Overeem, J.C. (1971). The role of cytokinins in clubroot formation.  
515 *Physiological Plant Pathology* 1, 151-161.
- 516 Desprez, T., Juraniec, M., Crowell, E.F., Jouy, H., Pochylova, Z., Parcy, F., Hofte, H., Gonneau, M.,  
517 and Vernhettes, S. (2007). Organization of cellulose synthase complexes involved in primary  
518 cell wall synthesis in *Arabidopsis thaliana*. *Proc Natl Acad Sci U S A* 104, 15572-15577.
- 519 Devos, S., Vissenberg, K., Verbelen, J.P., and Prinsen, E. (2005). Infection of Chinese cabbage by  
520 *Plasmodiophora brassicae* leads to a stimulation of plant growth: impacts on cell wall  
521 metabolism and hormone balance. *New Phytol* 166, 241-250.
- 522 Diener, A.C., and Ausubel, F.M. (2005). RESISTANCE TO FUSARIUM OXYSPORUM 1, a  
523 dominant *Arabidopsis* disease-resistance gene, is not race specific. *Genetics* 171, 305-321.
- 524 Ellinger, D., Naumann, M., Falter, C., Zwikowics, C., Jamrow, T., Manisseri, C., Somerville, S.C.,  
525 and Voigt, C.A. (2013). Elevated Early Callose Deposition Results in Complete Penetration  
526 Resistance to Powdery Mildew in *Arabidopsis*. *Plant Physiology* 161, 1433-1444.
- 527 Ferrari, S., Savatin, D.V., Sicilia, F., Gramegna, G., Cervone, F., and Lorenzo, G.D. (2013).  
528 Oligogalacturonides: plant damage-associated molecular patterns and regulators of growth and  
529 development. *Front Plant Sci* 4, 49.
- 530 Flors, V., Ton, J., Van Doorn, R., Jakab, G., Garcia-Agustin, P., and Mauch-Mani, B. (2008).  
531 Interplay between JA, SA and ABA signalling during basal and induced resistance against  
532 *Pseudomonas syringae* and *Alternaria brassicicola*. *Plant J* 54, 81-92.
- 533 Hamant, O., and Traas, J. (2010). The mechanics behind plant development. *New Phytol* 185, 369-  
534 385.
- 535 Harholt, J., Suttangkakul, A., and Vibe Scheller, H. (2010). Biosynthesis of pectin. *Plant Physiol* 153,  
536 384-395.
- 537 Hayashi, S., Ishii, T., Matsunaga, T., Tominaga, R., Kuromori, T., Wada, T., Shinozaki, K., and  
538 Hirayama, T. (2008). The glycerophosphoryl diester phosphodiesterase-like proteins SHV3

- 539 and its homologs play important roles in cell wall organization. *Plant Cell Physiol* 49, 1522-  
540 1535.
- 541 Hernandez-Blanco, C., Feng, D.X., Hu, J., Sanchez-Vallet, A., Deslandes, L., Llorente, F., Berrocal-  
542 Lobo, M., Keller, H., Barlet, X., Sanchez-Rodriguez, C., Anderson, L.K., Somerville, S.,  
543 Marco, Y., and Molina, A. (2007). Impairment of cellulose synthases required for Arabidopsis  
544 secondary cell wall formation enhances disease resistance. *Plant Cell* 19, 890-903.
- 545 Hogge, L.R., Reed, D.W., Underhill, E.W., and Haughn, G.W. (1988). Hplc Separation of  
546 Glucosinolates from Leaves and Seeds of Arabidopsis-Thaliana and Their Identification Using  
547 Thermospray Liquid-Chromatography Mass-Spectrometry. *Journal of Chromatographic*  
548 *Science* 26, 551-556.
- 549 Houston, K., Tucker, M.R., Chowdhury, J., Shirley, N., and Little, A. (2016). The Plant Cell Wall: A  
550 Complex and Dynamic Structure As Revealed by the Responses of Genes under Stress  
551 Conditions. *Front Plant Sci* 7, 984.
- 552 Huerta-Cepas, J., Szklarczyk, D., Forslund, K., Cook, H., Heller, D., Walter, M.C., Rattei, T., Mende,  
553 D.R., Sunagawa, S., Kuhn, M., Jensen, L.J., Von Mering, C., and Bork, P. (2016). eggNOG  
554 4.5: a hierarchical orthology framework with improved functional annotations for eukaryotic,  
555 prokaryotic and viral sequences. *Nucleic Acids Res* 44, D286-293.
- 556 Hurni, S., Scheuermann, D., Krattinger, S.G., Kessel, B., Wicker, T., Herren, G., Fitze, M.N., Breen,  
557 J., Presterl, T., Ouzunova, M., and Keller, B. (2015). The maize disease resistance gene  
558 *Htn1* against northern corn leaf blight encodes a wall-associated receptor-like  
559 kinase. *Proceedings of the National Academy of Sciences* 112, 8780-8785.
- 560 Irani, S., Trost, B., Waldner, M., Nayidu, N., Tu, J., Kusalik, A.J., Todd, C.D., Wei, Y., and Bonham-  
561 Smith, P.C. (2018). Transcriptome analysis of response to Plasmodiophora brassicae infection  
562 in the Arabidopsis shoot and root. *BMC Genomics* 19, 23.
- 563 Jia, Y.J., Feng, B.Z., Sun, W.X., and Zhang, X.G. (2009). Polygalacturonase, Pectate Lyase and Pectin  
564 Methylesterase Activity in Pathogenic Strains of Phytophthora capsici Incubated under  
565 Different Conditions. *Journal of Phytopathology* 157, 585-591.
- 566 Jones, D.M., Murray, C.M., Ketelaar, K.J., Thomas, J.J., Villalobos, J.A., and Wallace, I.S. (2016).  
567 The Emerging Role of Protein Phosphorylation as a Critical Regulatory Mechanism  
568 Controlling Cellulose Biosynthesis. *Front Plant Sci* 7, 684.
- 569 Kämper, J., Kahmann, R., Bolker, M., Ma, L.J., Brefort, T., Saville, B.J., Banuett, F., Kronstad, J.W.,  
570 Gold, S.E., Muller, O., Perlin, M.H., Wosten, H.A., De Vries, R., Ruiz-Herrera, J., Reynaga-  
571 Pena, C.G., Snetselaar, K., Mccann, M., Perez-Martin, J., Feldbrugge, M., Basse, C.W.,  
572 Steinberg, G., Ibeas, J.I., Holloman, W., Guzman, P., Farman, M., Stajich, J.E., Sentandreu,  
573 R., Gonzalez-Prieto, J.M., Kennell, J.C., Molina, L., Schirawski, J., Mendoza-Mendoza, A.,  
574 Greilinger, D., Munch, K., Rossel, N., Scherer, M., Vranes, M., Ladendorf, O., Vincon, V.,  
575 Fuchs, U., Sandrock, B., Meng, S., Ho, E.C., Cahill, M.J., Boyce, K.J., Klose, J., Klosterman,  
576 S.J., Deelstra, H.J., Ortiz-Castellanos, L., Li, W., Sanchez-Alonso, P., Schreier, P.H., Hauser-  
577 Hahn, I., Vaupel, M., Koopmann, E., Friedrich, G., Voss, H., Schluter, T., Margolis, J., Platt,  
578 D., Swimmer, C., Gnrke, A., Chen, F., Vysotskaia, V., Mannhaupt, G., Guldener, U.,  
579 Munsterkotter, M., Haase, D., Oesterheld, M., Mewes, H.W., Mauceli, E.W., Decaprio, D.,  
580 Wade, C.M., Butler, J., Young, S., Jaffe, D.B., Calvo, S., Nusbaum, C., Galagan, J., and  
581 Birren, B.W. (2006). Insights from the genome of the biotrophic fungal plant pathogen  
582 *Ustilago maydis*. *Nature* 444, 97-101.
- 583 Kavanagh, J.A., and Williams, P.H. (1981). Indole auxins in Plasmodiophora infected cabbage roots  
584 and hypocotyls. *Transactions of the British Mycological Society* 77, 125-129.
- 585 Kirkegaard, J.A., Wong, P.T.W., and Desmarchelier, J.M. (1996). In vitro suppression of fungal root  
586 pathogens of cereals by Brassica tissues. *Plant Pathology* 45, 593-603.

- 587 Kohorn, B.D. (2016). Cell wall-associated kinases and pectin perception. *J Exp Bot* 67, 489-494.
- 588 Kohorn, B.D., Johansen, S., Shishido, A., Todorova, T., Martinez, R., Defeo, E., and Obregon, P.  
589 (2009). Pectin activation of MAP kinase and gene expression is WAK2 dependent. *Plant J* 60,  
590 974-982.
- 591 Kohorn, B.D., Kobayashi, M., Johansen, S., Riese, J., Huang, L.F., Koch, K., Fu, S., Dotson, A., and  
592 Byers, N. (2006). An Arabidopsis cell wall-associated kinase required for invertase activity  
593 and cell growth. *Plant J* 46, 307-316.
- 594 Kohorn, B.D., and Kohorn, S.L. (2012). The cell wall-associated kinases, WAKs, as pectin receptors.  
595 *Front Plant Sci* 3, 88.
- 596 Kumar, M., Mishra, L., Carr, P., Pilling, M., Gardner, P., Mansfield, S.D., and Turner, S. (2018).  
597 Exploiting CELLULOSE SYNTHASE (CESA) Class Specificity to Probe Cellulose  
598 Microfibril Biosynthesis. *Plant Physiol* 177, 151-167.
- 599 Lahlali, R., Song, T., Chu, M., Yu, F., Kumar, S., Karunakaran, C., and Peng, G. (2017). Evaluating  
600 Changes in Cell-Wall Components Associated with Clubroot Resistance Using Fourier  
601 Transform Infrared Spectroscopy and RT-PCR. *Int J Mol Sci* 18.
- 602 Lally, D., Ingmire, P., Tong, H.Y., and He, Z.H. (2001). Antisense expression of a cell wall-associated  
603 protein kinase, WAK4, inhibits cell elongation and alters morphology. *Plant Cell* 13, 1317-  
604 1331.
- 605 Lerouxel, O., Cavalier, D.M., Liepman, A.H., and Keegstra, K. (2006). Biosynthesis of plant cell wall  
606 polysaccharides - a complex process. *Curr Opin Plant Biol* 9, 621-630.
- 607 Li, S., Bashline, L., Zheng, Y., Xin, X., Huang, S., Kong, Z., Kim, S.H., Cosgrove, D.J., and Gu, Y.  
608 (2016). Cellulose synthase complexes act in a concerted fashion to synthesize highly  
609 aggregated cellulose in secondary cell walls of plants. *Proc Natl Acad Sci U S A* 113, 11348-  
610 11353.
- 611 Ludwig-Müller, J., Bendel, U., Thermann, P., Ruppel, M., Epstein, E., and Hilgenberg, W. (1993).  
612 Concentrations of indole-3-acetic acid in plants of tolerant and susceptible varieties of Chinese  
613 cabbage infected with *Plasmodiophora brassicae* Woron. *New Phytologist* 125, 763-769.
- 614 Ludwig-Müller, J., Prinsen, E., Rolfe, S.A., and Scholes, J.D. (2009). Metabolism and Plant Hormone  
615 Action During Clubroot Disease. *Journal of Plant Growth Regulation* 28, 229-244.
- 616 Maleki, S.S., Mohammadi, K., and Ji, K.S. (2016). Characterization of Cellulose Synthesis in Plant  
617 Cells. *ScientificWorldJournal* 2016, 8641373.
- 618 Malinowski, R., Smith, J.A., Fleming, A.J., Scholes, J.D., and Rolfe, S.A. (2012). Gall formation in  
619 clubroot-infected Arabidopsis results from an increase in existing meristematic activities of  
620 the host but is not essential for the completion of the pathogen life cycle. *Plant J* 71, 226-238.
- 621 Manici, L.M., Lazzeri, L., and Palmieri, S. (1997). In vitro fungitoxic activity of some glucosinolates  
622 and their enzyme-derived products toward plant pathogenic fungi. *Journal of Agricultural and*  
623 *Food Chemistry* 45, 2768-2773.
- 624 Marin-Rodriguez, M.C., Orchard, J., and Seymour, G.B. (2002). Pectate lyases, cell wall degradation  
625 and fruit softening. *J Exp Bot* 53, 2115-2119.
- 626 Mauchmani, B., and Slusarenko, A.J. (1996). Production of salicylic acid precursors is a major  
627 function of phenylalanine ammonia-lyase in the resistance of Arabidopsis to *Peronospora*  
628 *parasitica*. *Plant Cell* 8, 203-212.
- 629 Meents, M.J., Watanabe, Y., and Samuels, A.L. (2018). The cell biology of secondary cell wall  
630 biosynthesis. *Annals of Botany* 121, 1107-1125.
- 631 Moriya, Y., Itoh, M., Okuda, S., Yoshizawa, A.C., and Kanehisa, M. (2007). KAAS: an automatic  
632 genome annotation and pathway reconstruction server. *Nucleic Acids Res* 35, W182-185.



- 633 Murúa, P., Goecke, F., Westermeier, R., Van West, P., Küpper, F.C., and Neuhauser, S. (2017).  
634 *Maullinia braseltonii* sp. nov. (Rhizaria, Phytomyxea, Phagomyxida): A Cyst-forming Parasite  
635 of the Bull Kelp *Durvillaea* spp. (Stramenopila, Phaeophyceae, Fucales). *Protist* 168, 468-480.
- 636 Nakano, Y., Yamaguchi, M., Endo, H., Rejab, N.A., and Ohtani, M. (2015). NAC-MYB-based  
637 transcriptional regulation of secondary cell wall biosynthesis in land plants. *Frontiers in Plant*  
638 *Science* 6.
- 639 Neuhauser, S., Kirchmair, M., Bulman, S., and Bass, D. (2014). Cross-kingdom host shifts of  
640 phytomyxid parasites. *BMC Evol Biol* 14, 33.
- 641 Neuhauser, S., Kirchmair, M., and Gleason, F.H. (2011). The ecological potentials of Phytomyxea  
642 (“plasmodiophorids”) in aquatic food webs. *Hydrobiologia* 659, 23-35.
- 643 Olszak, M., Truman, W., Stefanowicz, K., Sliwinska, E., Ito, M., Walerowski, P., Rolfe, S., and  
644 Malinowski, R. (2019). Transcriptional profiling identifies critical steps of cell cycle  
645 reprogramming necessary for *Plasmodiophora brassicae*-driven gall formation in *Arabidopsis*.  
646 *Plant J* 97, 715-729.
- 647 Popper, Z.A., Michel, G., Herve, C., Domozych, D.S., Willats, W.G., Tuohy, M.G., Kloareg, B., and  
648 Stengel, D.B. (2011). Evolution and diversity of plant cell walls: from algae to flowering  
649 plants. *Annu Rev Plant Biol* 62, 567-590.
- 650 Richmond, T.A., and Somerville, C.R. (2000). The cellulose synthase superfamily. *Plant Physiol* 124,  
651 495-498.
- 652 Rolfe, S.A., Strelkov, S.E., Links, M.G., Clarke, W.E., Robinson, S.J., Djavaheri, M., Malinowski, R.,  
653 Haddadi, P., Kagale, S., Parkin, I.A., Taheri, A., and Borhan, M.H. (2016). The compact  
654 genome of the plant pathogen *Plasmodiophora brassicae* is adapted to intracellular interactions  
655 with host *Brassica* spp. *BMC Genomics* 17, 272.
- 656 Rose, J.K., Braam, J., Fry, S.C., and Nishitani, K. (2002). The XTH family of enzymes involved in  
657 xyloglucan endotransglucosylation and endohydrolysis: current perspectives and a new  
658 unifying nomenclature. *Plant Cell Physiol* 43, 1421-1435.
- 659 Sarkar, P., Bosneaga, E., and Auer, M. (2009). Plant cell walls throughout evolution: towards a  
660 molecular understanding of their design principles. *J Exp Bot* 60, 3615-3635.
- 661 Scheller, C., Rampp, S., Rachinger, J.C., Prell, J., Koesling, S., Becker, S., and Strauss, C. (2010).  
662 Contrast enhancement and histopathological findings in vestibular schwannoma. *Cent Eur*  
663 *Neurosurg* 71, 35-38.
- 664 Schneider, R., Hanak, T., Persson, S., and Voigt, C.A. (2016). Cellulose and callose synthesis and  
665 organization in focus, what's new? *Curr Opin Plant Biol* 34, 9-16.
- 666 Schwelm, A., Fogelqvist, J., Knaust, A., Jülke, S., Lilja, T., Bonilla-Rosso, G., Karlsson, M.,  
667 Shevchenko, A., Dhandapani, V., Choi, S.R., Kim, H.G., Park, J.Y., Lim, Y.P., Ludwig-  
668 Müller, J., and Dixelius, C. (2015). The *Plasmodiophora brassicae* genome reveals insights in  
669 its life cycle and ancestry of chitin synthases. *Nature Scientific Reports* 5, 11153.
- 670 Shadle, G.L., Wesley, S.V., Korth, K.L., Chen, F., Lamb, C., and Dixon, R.A. (2003).  
671 Phenylpropanoid compounds and disease resistance in transgenic tobacco with altered  
672 expression of L-phenylalanine ammonia-lyase. *Phytochemistry* 64, 153-161.
- 673 Siemens, J., Gonzalez, M.C., Wolf, S., Hofmann, C., Greiner, S., Du, Y., Rausch, T., Roitsch, T., and  
674 Ludwig-Muller, J. (2011). Extracellular invertase is involved in the regulation of clubroot  
675 disease in *Arabidopsis thaliana*. *Mol Plant Pathol* 12, 247-262.
- 676 Siemens, J., Keller, I., Sarx, J., Kunz, S., Schuller, A., Nagel, W., Schmulling, T., Parniske, M., and  
677 Ludwig-Muller, J. (2006). Transcriptome analysis of *Arabidopsis* clubroots indicate a key role  
678 for cytokinins in disease development. *Mol Plant Microbe Interact* 19, 480-494.



- 679 Sivaguru, M., Ezaki, B., He, Z.H., Tong, H., Osawa, H., Baluska, F., Volkmann, D., and Matsumoto,  
680 H. (2003). Aluminum-induced gene expression and protein localization of a cell wall-  
681 associated receptor kinase in Arabidopsis. *Plant Physiol* 132, 2256-2266.
- 682 Speck, T., and Burgert, I. (2011). Plant Stems: Functional Design and Mechanics. *Annual Review of*  
683 *Materials Research* 41, 169-193.
- 684 Stone, B.A., And Clarke, A. E. (1992). "Chemistry and Biology of (1→3)-β-glucans.", in: *Bundoora:*  
685 *La Trobe University Press.*
- 686 Suzuki, S., Li, L., Sun, Y.H., and Chiang, V.L. (2006). The cellulose synthase gene superfamily and  
687 biochemical functions of xylem-specific cellulose synthase-like genes in *Populus trichocarpa*.  
688 *Plant Physiol* 142, 1233-1245.
- 689 Thimm, O., Bläsing, O., Gibon, Y., Nagel, A., Meyer, S., Krüger, P., Selbig, J., Müller, L.A., Rhee,  
690 S.Y., and Stitt, M. (2004). mapman: a user-driven tool to display genomics data sets onto  
691 diagrams of metabolic pathways and other biological processes. *The Plant Journal* 37, 914-  
692 939.
- 693 Tierens, K.F., Thomma, B.P., Brouwer, M., Schmidt, J., Kistner, K., Porzel, A., Mauch-Mani, B.,  
694 Cammue, B.P., and Broekaert, W.F. (2001). Study of the role of antimicrobial glucosinolate-  
695 derived isothiocyanates in resistance of Arabidopsis to microbial pathogens. *Plant Physiol*  
696 125, 1688-1699.
- 697 Tronchet, M., Balague, C., Kroj, T., Jouanin, L., and Roby, D. (2010). Cinnamyl alcohol  
698 dehydrogenases-C and D, key enzymes in lignin biosynthesis, play an essential role in disease  
699 resistance in Arabidopsis. *Mol Plant Pathol* 11, 83-92.
- 700 Underwood, W. (2012). The plant cell wall: a dynamic barrier against pathogen invasion. *Front Plant*  
701 *Sci* 3, 85.
- 702 Verbancic, J., Lunn, J.E., Stitt, M., and Persson, S. (2018). Carbon Supply and the Regulation of Cell  
703 Wall Synthesis. *Mol Plant* 11, 75-94.
- 704 Verica, J.A., and He, Z.H. (2002). The cell wall-associated kinase (WAK) and WAK-like kinase gene  
705 family. *Plant Physiol* 129, 455-459.
- 706 Verma, D.P.S., and Hong, Z. (2001). Plant callose synthase complexes. *Plant Molecular Biology* 47,  
707 693-701.
- 708 Voigt, C.A. (2014). Callose-mediated resistance to pathogenic intruders in plant defense-related  
709 papillae. *Frontiers in Plant Science* 5.
- 710 Walerowski, P., Gündel, A., Yahaya, N., Truman, W., Sobczak, M., Olszak, M., Rolfe, S., Borisjuk,  
711 L., and Malinowski, R. (2018). Clubroot Disease Stimulates Early Steps of Phloem  
712 Differentiation and Recruits SWEET Sucrose Transporters within Developing Galls. *The*  
713 *Plant Cell* 30, 3058-3073.
- 714 Wang, S., Yu, F., Zhang, W., Tang, J., Li, J., Yu, L., Wang, H., and Jiang, J. (2019). Comparative  
715 transcriptomic analysis reveals gene expression changes during early stages of  
716 *Plasmodiophora brassicae* infection in cabbage (*Brassica oleracea* var. *capitata* L.). *Canadian*  
717 *Journal of Plant Pathology* 41, 188-199.
- 718 Xue, C.Y., Zhou, R.J., Li, Y.J., Xiao, D., and Fu, J.F. (2018). Cell-wall-degrading enzymes produced  
719 in vitro and in vivo by *Rhizoctonia solani*, the causative fungus of peanut sheath blight. *PeerJ*  
720 6, e5580.
- 721 Zhao, Y., Bi, K., Gao, Z., Chen, T., Liu, H., Xie, J., Cheng, J., Fu, Y., and Jiang, D. (2017).  
722 Transcriptome Analysis of Arabidopsis thaliana in Response to *Plasmodiophora brassicae*  
723 during Early Infection. *Front Microbiol* 8, 673.
- 724 Zuo, W., Chao, Q., Zhang, N., Ye, J., Tan, G., Li, B., Xing, Y., Zhang, B., Liu, H., Fengler, K.A.,  
725 Zhao, J., Zhao, X., Chen, Y., Lai, J., Yan, J., and Xu, M. (2015). A maize wall-associated  
726 kinase confers quantitative resistance to head smut. *Nat Genet* 47, 151-157.

727

728

729 **Figure legends**

730

731 **Figure 1: Clubroot disease in Brassica species.** A: Typical clubroot symptoms caused by the  
732 soil-borne pathogen *Plasmodiophora brassicae*. Above ground growth of diseased plants is  
733 impaired. The dashed line indicates the soil surface. *Brassicae* spp. with and without (\*)  
734 clubroot symptoms. (I), (II) *Brassica rapa* subsp. *perkinensis* (Chinese cabbage); (III) *Brassica*  
735 *oleracea* var. *gongylodes* (kohlrabi); (IV) *Brassica oleracea* var. *capitata* (cabbage); (V)  
736 *Brassica oleracea* var. *italica* (broccoli). B: Section through a healthy *B. rapa* root. Starch  
737 granules are indicated with arrowheads. C: Section through a root gall of infected *B. rapa*.  
738 *Plasmodiophora brassicae* plasmodia are marked with stars and resting spores with triangles.  
739 Scale bar: 30  $\mu$ m.

740

741 **Figure 2: Synthesis of plant cell wall components (A) and modulation of cell wall**  
742 **components and related plant response (B).** (A): Cellulose and callose synthesis are mediated  
743 through cellulose synthase (CeSA and callose synthase (CalS) in the plasma membrane. UDP-  
744 glucose serves as substrate for the synthesis. Sucrose synthase breaks down sucrose and  
745 generates UDP-glucose and fructose. Pectins and hemicelluloses are synthesized in the Golgi  
746 apparatus. Native pectins and hemicelluloses with sufficient length are transported by vesicles,  
747 secreted to the apoplast, and enzymatically incorporated into the cell wall. During infection  
748 with the biotrophic clubroot pathogen *Plasmodiophora brassicae*, genes involved in the  
749 synthesis of cellulose, hemicelluloses, pectins and callose are down-regulated. Genes coding  
750 for sucrose synthase are up-regulated in clubroots. Up- and down-regulated processes in  
751 clubroots is indicated with orange arrows. (B): Cell wall degrading and modulating enzymes  
752 and their target components. Cellulases modulate cellulose fibrils, XTHs cleave and re-anchor  
753 xyloglucan chains (hemicellulose), expansins disrupt linkages between hemicellulose and  
754 cellulose, and pectinases cleave pectins. Depolymerized pectins (oligoglacturonases, OGs) are  
755 bound and recognized by wall associated kinase/-like (WAK/L) and can trigger further plant  
756 response cascades. Pectinase-inhibitors (PMEIs, PGIPs) inhibit PME and PG activity. During  
757 infection with the biotrophic clubroot pathogen *Plasmodiophora brassicae*, genes like  
758 cellulases, pectinases (cell wall component degradation) and expansins and XTHs (cell  
759 expansion) are up-regulated in infected tissue. Enzyme inhibitors like PMEI or PGIP are down-  
760 regulated. Genes coding for WAKs (involved in cell elongation) are up-regulated and for  
761 WAKLs (stress response) are down-regulated in clubroots. Up- and down-regulated processes  
762 in clubroots is indicated with orange arrows.

763
